# Supplementary material for: Qluster: An easy-to-implement generic workflow for robust clustering of health data
Source: Front Artif Intell. 2023 Feb 6;5:1055294. doi: 10.3389/frai.2022.1055294 (PMC9939832; doi:10.3389/frai.2022.1055294)
Supplement: Appendix A — Description of algorithms in selected libraries on some of the criteria defining genericity, ease of implementation and use, and robustness. [file Data_Sheet_1.xlsx]

## Sheet: Appendix A
	Survey R	https://cran.r-project.org/web/views/Cluster.html
	Algorithms	Categories	Genericity			Ease of implementation						Robustness
			handling large data / velocity	data type	handling high dimensionnality	Number of required parameters	Handy packages					handling noisy data	handling multicollinearity
							cluster	clue	ClValid	FPC	Sklearn
	Affinity propagation	Partitionning-based	-	continuous	No	2					x	No	No
	CLARA	Partitionning-based	++	continuous	Partially	1	x		x	x		No	No
	KMEANS	Partitionning-based	+	continuous	No	1			x	x	x	No	No
	KMEDOIDS	Partitionning-based	-	continuous	Partially	1		x				Yes	No
	KPROTOTYPES	Partitionning-based	-	mixed	No	2		x				No	No
	Mean Shift	Partitionning-based	-	continuous	No	1					x	No	No
	Mini Batch KMEANS	Partitionning-based	++	continuous	Yes	1					x	No	No
	PAM	Partitionning-based	-	continuous	No	1	x	x	x	x		No	No
	SOTA	Model-based	-	continuous	No	1			x			No	No
	AGNES	Hierarchical	-	continuous	No	1	x		x		x	No	No
	BIRCH	Hierarchical	++	continuous	Partially	2					x	Yes	No
	DIANA	Hierarchical	-	continuous	No	1	x		x			No	No
	MONA	Hierarchical	-	binary	No	0	x					No	No
	DBSCAN	Density-based	+	continuous	No	2				x	x	No	No
	OPTICS	Density-based	+	continuous	No	2						Yes	No
